# Supplementary material
Source: PubMed Central journal article supplement (PMC3529366)
Supplement: supp_en.2012-1585v1_EN-12-1585_Supplemental_File.pdf [file supp_en.2012-1585v1_EN-12-1585_Supplemental_File.pdf]

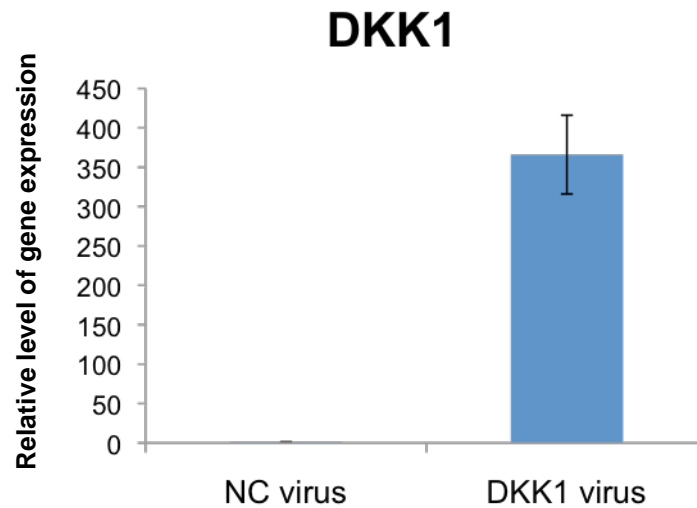

**Supplemental Fig. 1: Overexpression of DKK1 in HESC via an adenovirus-based vector.** HESC were transduced with recombinant adenovirus expressing DKK1 (Ad-*DKK1*) or GFP (Ad-NC) and subjected to *in vitro* decidualization. Cells were harvested at 72 h and the expression of *DKK1* was assessed by q-PCR.

**Table 1. Sequence of primers used in qPCR analysis**

| gene    | Forward primer          | Backward primer           |
|---------|-------------------------|---------------------------|
| BCL2L11 | CACAAACCCCAAGTCCTCCTT   | TTCAGCCTGCCTCATGGAA       |
| BMP2    | CCCACTTGGAGGAGAAACAA    | AGCCACAATCCAGTCATTCC      |
| CDKN1C  | GCCTCTGATCTCCGATTTCTT   | GACATCGCCCCGACGACTT       |
| CTNNB1  | AAAATGGCAGTGCCTTTAG     | TTGAAGGCAGTCTGTGCGTA      |
| DCN     | AGCTCTCCTACATCCGCATT    | GCTAGCTGCATCAACTCTGC      |
| DKK1    | AGCGTTGTTACTGTGGAGAAG   | GTGTGAAGCCTAGAAGAATTA     |
| DKK2    | AGTACCCGCTGCAATAATGG    | GAAATGACGAGCACAGCAAA      |
| DKK3    | CTGTGTGTCTGGGGTCACTG    | GCTCTAGCTCCCAGGTGATG      |
| DKK4    | CCAGAAAGTTCTGCCTCCAG    | CCCAGTTGTTCTTCTGCAT       |
| ESR1    | CAAGCCCCTCATGATCAA      | CTGATCATGGAGGGTCAAATC     |
| FOXO1a  | GACACCCTCCAGGAAGCGA     | TTGGGTCAGGCGGTTCA         |
| FZD1    | CACCTTGTGAGCCGACCAA     | CAGCACTGACCAAATGCCAAT     |
| FZD2    | TTTCTGGGCGAGCGTGAT      | AAACGCGTCTCCTCCTGTGA      |
| FZD3    | TGGCTATGGTGGATGATCAA    | TGGAGGCTGCCGTGGTA         |
| FZD4    | GGCGGCATGTGTCTTTCAGT    | GAATTTGCTGCAGTTCAGACTCTCT |
| FZD5    | CGCGAGCACAACCACATC      | AGAAGTAGACCAGGAGGAAGACGAT |
| FZD6    | ACAAGCTGAAGGTCATTTCCAAA | GCTACTGCAGAAGTGCCATGAT    |
| FZD7    | CAACGGCCTGATGTACTTTAAGG | CATGTCCACCAGGTAGGTGAGA    |
| GAPDH   | CGACCACTTTGTCAAGCTCA    | AGGGGTCTACATGGCAACTG      |
| IGFBP1  | CCAAACTGCAACAAGAATG     | GTAGACGCACCAGCAGAG        |
| LEFTY2  | CCTGAGAGGGTGCTAAGAG     | GGTAGGTAGGGGCTGTCT        |
| LRP5    | CGTGATTGCCGACGATCTC     | TCCGGCCGCTAGTCTTGTC       |

|        |                         |                            |
|--------|-------------------------|----------------------------|
| LRP6   | TTATGTGCCACACCCAAGTTCT  | CTGAGGGAGCTGATCATTGAT      |
| PGR    | TGTATTTGTGCGTGTGGGTG    | TACAGCCCATTCCCAGGAAG       |
| PRL    | CTACATCCATAACCTCTCCTCA  | GGGCTTGCTCCTTGTCTTC        |
| SFRP1  | GGTCATGCAGTTCTTCGGCT    | TCCTCAGTGCAAACCTCGCTG      |
| SFRP2  | ACCGAGGAAGCTCCAAAGGTAT  | TCATCTCCTCACAGGTGCACTG     |
| SFRP3  | CTCATCAAGTACCGCCACTCGTG | CCGGAATAGGTCTTCTGTGTAGCTC  |
| SST    | AGACTCCGTCAGTTTCTGC     | CTGGTTGGGTTTCAGACAG        |
| TIMP3  | GTAGACGCACCAGCAGAG      | CAACCCAGGTGATACCGATAG      |
| WNT2   | GGATGACCAAGTGTGGGTGTAAG | GTGCACATCCAGAGCTTCCA       |
| WNT2b  | GGCACGAGTGATCTGTGACAATA | CGCATGATGTCTGGGTAACG       |
| WNT3   | CTGGGCCAGCAGTACACATCT   | GGCATGATCTCGATGTAATTGC     |
| WNT4   | CATGCAACAAGACGTCCAAG    | AAGCAGCACCAGTGGAATTT       |
| WNT5a  | TCTCCTTCGCCCAGGTTGTA    | CTTCTGACATCTGAACAGGGTTATTC |
| WNT5b  | CCAACTCCTGGTGGTCATTAGC  | TGGGCACCGATGATAAACATC      |
| WNT6   | TCCGCCGCTGGAATTG        | AGGCCGTCTCCCGAATGT         |
| WNT10b | CCTCGCGGGTCTCCTGTT      | AGGCCCAGAATCTCATTGCTTA     |
| WNT11  | CGTGTGCTATGGCATCAAGTG   | GCAGTGTTGCGTCTGGTTCA       |
| WNT16  | GCCAATTTGCCGCTGAAC      | CGGCAGCAGGTACGGTTT         |
| 36B4   | GTGTTTCGACAATGGCAGCAT   | GACACCCTCCAGGAAGCGA        |

---
